# Supplementary material for: Social Networks in the Upin &amp; Ipin Universe: Comparative Analysis of a Series and Movie in Southeast Asian Media
Source: Research Square preprint supplement (doi:10.21203/rs.3.rs-6329035/v1), 2025-06-09
Supplement: Supplementary file 1 [file 08e5462ca53c64e95ac30148.xlsx]

## Sheet: Positive
		E1	E2	E3	E4	E5	E6	E7	E8	E9	E10	E11	E12	E13	E14	E15	E16	E17	E18	sum
Upin	Ipin	1	1	1	1	1	1		1	1	1	1	1	1	1	1	1	1	1	17
Ipin	Upin	1	1	1	1	1	1		1	1	1	1		1	1	1	1			14
Ipin	Kak Ros	1	1	1		1			1	1	1			1	1			1		10
Kak Ros	Ipin	1	1	1					1	1				1	1	1		1		9
Kak Ros	Opah	1		1		1					1	1		1		1				7
Opah	Upin	1		1		1	1		1	1				1		1		1		9
Upin	Opah	1		1		1	1		1	1	1	1		1	1	1	1	1		13
Ipin	Opah	1		1	1	1	1		1	1		1		1	1	1	1	1		13
Opah	Ipin	1		1	1	1	1		1	1				1			1	1		10
Kak Ros	Upin	1	1	1					1	1		1		1	1	1	1	1		11
Opah	Kak Ros	1		1		1					1			1	1	1				7
Upin	Kak Ros		1	1	1	1			1	1	1	1		1	1	1	1	1		13
Mei Mei	Rajoo		1			1														2
Rajoo	Mei Mei		1			1														2
Fizi	Upin				1	1		1				1	1	1	1		1	1		9
Fizi	Ipin				1										1				1	3
Upin	Ehsan				1							1				1	1	1	1	6
Ehsan	Upin				1							1				1		1	1	5
Upin	Tok Dalang				1					1						1	1		1	5
Tok Dalang	Upin				1					1						1			1	4
Ipin	Tok Dalang				1		1			1						1			1	5
Tok Dalang	Ipin																		1	1
Fizi	Ehsan				1	1										1	1		1	5
Upin	Fizi					1	1	1				1	1	1	1					7
Ipin	Ehsan					1								1		1		1		4
Ehsan	Fizi					1						1					1		1	4
Ipin	Fizi					1							1	1	1					4
Upin	Rajoo					1	1													2
Ipin	Rajoo					1	1			1										3
Tok Dalang	Opah					1										1				2
Mei Mei	Upin						1	1											1	3
Rajoo	Upin						1													1
Ehsan	Rajoo						1													1
Rajoo	Ehsan						1													1
Ehsan	Opah						1													1
Mei Mei	Opah						1											1		2
Fizi	Opah						1													1
Opah	Fizi						1													1
Upin	Salleh						1													1
Ehsan	Jarjit							1												1
Upin	Mei Mei							1						1						2
Fizi	Mei Mei							1											1	2
Mei Mei	Fizi							1											1	2
Ehsan	Mei Mei							1						1						2
Upin	Mail							1			1	1	1	1				1		6
Mei Mei	Mail							1					1						1	3
Mail	Mei Mei							1											1	2
Upin	Cikgu Yasmin							1					1							2
Ipin	Cikgu Yasmin							1					1							2
Ehsan	Cikgu Yasmin							1												1
Fizi	Cikgu Yasmin							1												1
Cikgu Yasmin	Fizi							1					1							2
Cikgu Yasmin	Ipin							1					1							2
Mei Mei	Cikgu Yasmin							1					1							2
Cikgu Yasmin	Mei Mei							1					1							2
Jarjit	Mei Mei							1												1
Rajoo	Ipin									1										1
Mail	Ipin										1									1
Mail	Upin											1	1	1				1		4
Ipin	Mail											1		1						2
Ehsan	Mail											1	1					1		3
Fizi	Mail												1						1	2
Mail	Fizi												1						1	2
Mail	Ehsan												1					1		2
Mei Mei	Ehsan												1	1				1		3
Cikgu Yasmin	Mail												1							1
Cikgu Yasmin	Upin												1							1
Jarjit	Cikgu Yasmin												1							1
Mail	Cikgu Yasmin												1							1
Ehsan	Ipin													1		1		1		3
Ipin	Mei Mei													1						1
Ayah Ehsan	Ehsan															1				1
Ehsan	Ayah Ehsan															1				1
Opah	Tok Dalang															1				1
Opah	Mail																	1		1
Mail	Opah																	1		1
Upin	Jarjit																	1		1
Mei Mei	Jarjit																	1		1
Kak Ros	Mail																	1		1
Jarjit	Tok Dalang																		1	1
Mail	Tok Dalang																		1	1
Ehsan	Tok Dalang																		1	1
Tok Dalang	Ehsan																		1	1
Tok Dalang	Mail																		1	1
Fizi	Tok Dalang																		1	1
Mei Mei	Tok Dalang																		1	1
Tok Dalang	Mei Mei																		1	1
Tok Dalang	Jarjit																		1	1

## Sheet: Undirected
Source	Target	Relationship
Upin	Ipin	fam
Ipin	Kak Ros	fam
Kak Ros	Opah	fam
Opah	Upin	fam
Ipin	Opah	fam
Kak Ros	Upin	fam
Mei Mei	Rajoo	gr
Fizi	Upin	gr
Fizi	Ipin	gr
Upin	Ehsan	gr
Upin	Tok Dalang	gr
Ipin	Tok Dalang	gr
Fizi	Ehsan	gr
Ipin	Ehsan	gr
Upin	Rajoo	gr
Ipin	Rajoo	gr
Tok Dalang	Opah	gr
Mei Mei	Upin	gr
Ehsan	Rajoo	gr
Ehsan	Opah	gr
Mei Mei	Opah	gr
Fizi	Opah	gr
Upin	Salleh	gr
Ehsan	Jarjit	gr
Fizi	Mei Mei	gr
Ehsan	Mei Mei	gr
Upin	Mail	gr
Mei Mei	Mail	gr
Upin	Cikgu Yasmin	gr
Ipin	Cikgu Yasmin	gr
Ehsan	Cikgu Yasmin	gr
Fizi	Cikgu Yasmin	gr
Mei Mei	Cikgu Yasmin	gr
Jarjit	Mei Mei	gr
Mail	Ipin	gr
Ehsan	Mail	gr
Fizi	Mail	gr
Cikgu Yasmin	Mail	gr
Jarjit	Cikgu Yasmin	gr
Ipin	Mei Mei	gr
Ayah Ehsan	Ehsan	fam
Opah	Mail	gr
Upin	Jarjit	gr
Kak Ros	Mail	gr
Jarjit	Tok Dalang	gr
Mail	Tok Dalang	gr
Ehsan	Tok Dalang	gr
Fizi	Tok Dalang	gr
Mei Mei	Tok Dalang	gr

## Sheet: Final
Source	Target	Weight	Relationship
Upin	Ipin	17	fam
Ipin	Upin	14	fam
Ipin	Kak Ros	10	fam
Kak Ros	Ipin	9	fam
Kak Ros	Opah	7	fam
Opah	Upin	9	fam
Upin	Opah	13	fam
Ipin	Opah	13	fam
Opah	Ipin	10	fam
Kak Ros	Upin	11	fam
Opah	Kak Ros	7	fam
Upin	Kak Ros	13	fam
Mei Mei	Rajoo	2	gr
Rajoo	Mei Mei	2	gr
Fizi	Upin	9	gr
Fizi	Ipin	3	gr
Upin	Ehsan	6	gr
Ehsan	Upin	5	gr
Upin	Tok Dalang	5	gr
Tok Dalang	Upin	4	gr
Ipin	Tok Dalang	5	gr
Tok Dalang	Ipin	1	gr
Fizi	Ehsan	5	gr
Upin	Fizi	7	gr
Ipin	Ehsan	4	gr
Ehsan	Fizi	4	gr
Ipin	Fizi	4	gr
Upin	Rajoo	2	gr
Ipin	Rajoo	3	gr
Tok Dalang	Opah	2	gr
Mei Mei	Upin	3	gr
Rajoo	Upin	1	gr
Ehsan	Rajoo	1	gr
Rajoo	Ehsan	1	gr
Ehsan	Opah	1	gr
Mei Mei	Opah	2	gr
Fizi	Opah	1	gr
Opah	Fizi	1	gr
Upin	Salleh	1	gr
Ehsan	Jarjit	1	gr
Upin	Mei Mei	2	gr
Fizi	Mei Mei	2	gr
Mei Mei	Fizi	2	gr
Ehsan	Mei Mei	2	gr
Upin	Mail	6	gr
Mei Mei	Mail	3	gr
Mail	Mei Mei	2	gr
Upin	Cikgu Yasmin	2	gr
Ipin	Cikgu Yasmin	2	gr
Ehsan	Cikgu Yasmin	1	gr
Fizi	Cikgu Yasmin	1	gr
Cikgu Yasmin	Fizi	2	gr
Cikgu Yasmin	Ipin	2	gr
Mei Mei	Cikgu Yasmin	2	gr
Cikgu Yasmin	Mei Mei	2	gr
Jarjit	Mei Mei	1	gr
Rajoo	Ipin	1	gr
Mail	Ipin	1	gr
Mail	Upin	4	gr
Ipin	Mail	2	gr
Ehsan	Mail	3	gr
Fizi	Mail	2	gr
Mail	Fizi	2	gr
Mail	Ehsan	2	gr
Mei Mei	Ehsan	3	gr
Cikgu Yasmin	Mail	1	gr
Cikgu Yasmin	Upin	1	gr
Jarjit	Cikgu Yasmin	1	gr
Mail	Cikgu Yasmin	1	gr
Ehsan	Ipin	3	gr
Ipin	Mei Mei	1	gr
Ayah Ehsan	Ehsan	1	fam
Ehsan	Ayah Ehsan	1	fam
Opah	Tok Dalang	1	gr
Opah	Mail	1	gr
Mail	Opah	1	gr
Upin	Jarjit	1	gr
Mei Mei	Jarjit	1	gr
Kak Ros	Mail	1	gr
Jarjit	Tok Dalang	1	gr
Mail	Tok Dalang	1	gr
Ehsan	Tok Dalang	1	gr
Tok Dalang	Ehsan	1	gr
Tok Dalang	Mail	1	gr
Fizi	Tok Dalang	1	gr
Mei Mei	Tok Dalang	1	gr
Tok Dalang	Mei Mei	1	gr
Tok Dalang	Jarjit	1	gr

## Sheet: Details
Name	Gender	Race
Upin	M	Malay
Ipin	M	Malay
Kak Ros	F	Malay
Opah	F	Malay
Mei Mei	F	Chinese
Rajoo	M	Indian
Fizi	M	Malay
Ehsan	M	Malay
Tok Dalang	M	Malay
Salleh	M	Malay
Jarjit	M	Sikh
Mail	M	Malay
Cikgu Yasmin	F	Malay
Ayah Ehsan	M	Malay
