# Supplementary material for: Social Networks in the Upin &amp; Ipin Universe: Comparative Analysis of a Series and Movie in Southeast Asian Media
Source: Research Square preprint supplement (doi:10.21203/rs.3.rs-6329035/v1), 2025-06-09
Supplement: Supplementary file 2 [file d501097ff530c3294abb8a9e.xlsx]

## Sheet: Positive
		0 to 5	6 to 10	11 to 15	16 to 20	21 to 25	26 to 30	31 to 35	36 to 40	41 to 45	46 to 50	51 to 55	56 to 60	61 to 65	66 to 70	71 to 75	76 to 80	81 to 85	86 to 90	90 to 95	Sum
Lim	Badrol	1	1	1	1	1	1		1		1				1	1	1				11
Badrol	Lim	1	1	1	1	1	1		1	1	1				1	1	1		1		13
Rokiah	Tok Dalang	1																			1
Tok Dalang	Rokiah	1																			1
Tok Dalang	Crew	1																			1
Badrol	Pak Cik Bas		1																		1
Pak Cik Bas	Badrol		1																		1
Pak Cik Bas	Mechanic		1																		1
Mechanic	Pak Cik Bas		1																		1
Anak Pak Cik Bas	Pak Cik Bas		1																		1
Lim	Pak Cik Bas		1																		1
Pak Cik Bas	Lim		1																		1
Pak Mail	Singh		1												1	1	1		1		5
Badrol	Pak Mail		1																		1
Pak Mail	Badrol		1														1				2
Lim	Singh		1																		1
Singh	Lim		1																		1
Badrol	Singh		1	1											1						3
Singh	Badrol		1	1											1						3
Singh	Pak Mail		1												1	1	1		1		5
Pak Mail	Lim		1																		1
Lim	Pak Mail			1																	1
Upin	Ipin			1						1				1	1			1		1	6
Ipin	Upin			1	1			1	1	1				1	1			1			8
Upin	Muthu			1																	1
Muthu	Upin			1																	1
Salleh	Muthu			1																	1
Muthu	Salleh			1															1		2
Upin	Salleh			1												1					2
Upin	Opah			1															1		2
Ipin	Opah			1															1		2
Opah	Salleh			1															1		2
Salleh	Opah			1																	1
Opah	Ah Tong			1								1									2
Ah Tong	Opah			1								1									2
Ipin	Ah Tong			1																	1
Ah Tong	Muthu			1																	1
Muthu	Ah Tong			1								1									2
Badrol	Muthu			1																	1
Muthu	Badrol			1																	1
Ipin	Muthu			1																	1
Kak Ros	Muthu			1																	1
Muthu	Kak Ros			1																	1
Lim	Kak Ros			1	1			1	1						1	1					6
Ipin	Kak Ros			1				1		1	1	1		1		1			1		8
Salleh	Pak Mail				1										1						2
Pak Mail	Salleh				1										1						2
Salleh	Singh				1											1					2
Singh	Salleh				1										1						2
Upin	Badrol				1																1
Badrol	Upin				1																1
Badrol	Kak Ros				1				1	1											3
Ipin	Badrol				1																1
Ipin	Lim				1				1												2
Badrol	Tok Dalang				1	1	1												1		4
Tok Dalang	Badrol				1	1	1												1		4
Tok Dalang	Lim				1		1														2
Lim	Tok Dalang				1	1	1														3
Driving Instructor	Driving Student					1															1
Rajoo	Sapy					1	1	1													3
Lim	Rajoo					1	1	1		1	1						1		1		7
Rajoo	Lim					1	1	1	1	1	1								1		7
Badrol	Rajoo					1	1			1						1					4
Rajoo	Badrol					1	1	1		1											4
Tok Dalang	Rajoo						1														1
Rajoo	Tok Dalang						1														1
Rajoo	Upin							1	1	1	1							1			5
Upin	Sapy							1													1
Ipin	Sapy							1													1
Upin	Kak Ros							1		1	1	1	1	1							6
Lim	Sapy							1													1
Upin	Lim								1		1										2
Upin	Rajoo								1	1	1						1	1	1		6
Ipin	Rajoo								1				1					1	1		4
Kak Ros	Badrol								1	1											2
Ipin	Oopet											1		1				1			3
Rajoo	Ipin									1											1
Rajoo	Oopet									1		1	1	1		1	1	1	1		8
Oopet	Rajoo									1		1		1				1			4
Upin	Oopet									1		1		1				1	1		5
Rajoo	Kak Ros									1		1	1	1	1						5
Opah	Tok Dalang										1										1
Muthu	Tok Dalang										1	1							1	1	4
Tok Dalang	Opah										1									1	2
Kak Ros	Rajoo											1	1	1	1		1				5
Oopet	Upin											1									1
Muthu	Opah											1								1	2
Opah	Muthu											1									1
Tok Dalang	Ah Tong											1									1
Ah Tong	Tok Dalang											1							1		2
Kak Ros	Upin											1									1
Oopet	Kak Ros												1								1
Kak Ros	Ipin												1								1
Pak Mail	Tauke														1						1
Tauke	Pak Mail														1						1
Kak Ros	Lim															1					1
Salleh	Upin															1					1
Salleh	Ipin															1					1
Kak Ros	Salleh															1					1
Salleh	Kak Ros															1					1
Ipin	Salleh															1					1
Pak Mail	Rajoo																1				1
Pak Mail	Oopet																1				1
Pak Mail	Mak Oopet																1				1
Badrol	Snake																	1			1
Oopet	Mak Oopet																	1			1
Mak Oopet	Oopet																	1			1
Kak Ros	Opah																		1		1
Rajoo	Muthu																		1		1
Muthu	Rajoo																		1		1
Ah Tong	Lim																		1		1
Lim	Ah Tong																		1		1
Tok Dalang	Salleh																		1		1
Ah Tong	Salleh																		1		1

## Sheet: Timing
1.33.58
1.28.58
1.23.58
1.18.58
1.13.58
1.08.58
1.03.58
58.58
53.58
48.58
43.58
38.58
33.58
28.58
23.58
18.58
13.58
8.58
3.58

## Sheet: Undirected
Source	Target	Relationship
Lim	Badrol	gr
Rokiah	Tok Dalang	gr
Tok Dalang	Crew	gr
Badrol	Pak Cik Bas	gr
Pak Cik Bas	Mechanic	gr
Anak Pak Cik Bas	Pak Cik Bas	fam
Lim	Pak Cik Bas	gr
Pak Mail	Singh	gr
Badrol	Pak Mail	br
Lim	Singh	br
Badrol	Singh	br
Pak Mail	Lim	br
Upin	Ipin	fam
Upin	Muthu	gr
Salleh	Muthu	br
Upin	Salleh	br
Upin	Opah	fam
Ipin	Opah	fam
Opah	Salleh	br
Opah	Ah Tong	gr
Ipin	Ah Tong	gr
Ah Tong	Muthu	gr
Badrol	Muthu	gr
Ipin	Muthu	gr
Kak Ros	Muthu	gr
Lim	Kak Ros	gr
Ipin	Kak Ros	fam
Salleh	Pak Mail	gr
Salleh	Singh	gr
Upin	Badrol	gr
Badrol	Kak Ros	gr
Ipin	Badrol	gr
Ipin	Lim	gr
Badrol	Tok Dalang	fam
Tok Dalang	Lim	gr
Driving Instructor	Driving Student	gr
Rajoo	Sapy	gr
Lim	Rajoo	gr
Badrol	Rajoo	gr
Tok Dalang	Rajoo	gr
Rajoo	Upin	gr
Upin	Sapy	gr
Ipin	Sapy	gr
Upin	Kak Ros	fam
Lim	Sapy	gr
Upin	Lim	gr
Ipin	Rajoo	gr
Ipin	Oopet	gr
Rajoo	Oopet	gr
Upin	Oopet	gr
Rajoo	Kak Ros	gr
Opah	Tok Dalang	gr
Muthu	Tok Dalang	gr
Muthu	Opah	gr
Tok Dalang	Ah Tong	gr
Oopet	Kak Ros	gr
Pak Mail	Tauke	gr
Salleh	Ipin	br
Kak Ros	Salleh	br
Pak Mail	Rajoo	br
Pak Mail	Oopet	br
Pak Mail	Mak Oopet	br
Badrol	Snake	br
Oopet	Mak Oopet	fam
Kak Ros	Opah	fam
Rajoo	Muthu	fam
Ah Tong	Lim	gr
Tok Dalang	Salleh	br
Ah Tong	Salleh	br

## Sheet: Final
Source	Target	Weight	Relationship
Lim	Badrol	11	gr
Badrol	Lim	13	gr
Rokiah	Tok Dalang	1	gr
Tok Dalang	Rokiah	1	gr
Tok Dalang	Crew	1	gr
Badrol	Pak Cik Bas	1	gr
Pak Cik Bas	Badrol	1	gr
Pak Cik Bas	Mechanic	1	gr
Mechanic	Pak Cik Bas	1	gr
Anak Pak Cik Bas	Pak Cik Bas	1	fam
Lim	Pak Cik Bas	1	gr
Pak Cik Bas	Lim	1	gr
Pak Mail	Singh	5	gr
Badrol	Pak Mail	1	br
Pak Mail	Badrol	2	br
Lim	Singh	1	br
Singh	Lim	1	br
Badrol	Singh	3	br
Singh	Badrol	3	br
Singh	Pak Mail	5	gr
Pak Mail	Lim	1	br
Lim	Pak Mail	1	br
Upin	Ipin	6	fam
Ipin	Upin	8	fam
Upin	Muthu	1	gr
Muthu	Upin	1	gr
Salleh	Muthu	1	br
Muthu	Salleh	2	br
Upin	Salleh	2	br
Upin	Opah	2	fam
Ipin	Opah	2	fam
Opah	Salleh	2	br
Salleh	Opah	1	br
Opah	Ah Tong	2	gr
Ah Tong	Opah	2	gr
Ipin	Ah Tong	1	gr
Ah Tong	Muthu	1	gr
Muthu	Ah Tong	2	gr
Badrol	Muthu	1	gr
Muthu	Badrol	1	gr
Ipin	Muthu	1	gr
Kak Ros	Muthu	1	gr
Muthu	Kak Ros	1	gr
Lim	Kak Ros	6	gr
Ipin	Kak Ros	8	fam
Salleh	Pak Mail	2	gr
Pak Mail	Salleh	2	gr
Salleh	Singh	2	gr
Singh	Salleh	2	gr
Upin	Badrol	1	gr
Badrol	Upin	1	gr
Badrol	Kak Ros	3	gr
Ipin	Badrol	1	gr
Ipin	Lim	2	gr
Badrol	Tok Dalang	4	fam
Tok Dalang	Badrol	4	fam
Tok Dalang	Lim	2	gr
Lim	Tok Dalang	3	gr
Driving Instructor	Driving Student	1	gr
Rajoo	Sapy	3	gr
Lim	Rajoo	7	gr
Rajoo	Lim	7	gr
Badrol	Rajoo	4	gr
Rajoo	Badrol	4	gr
Tok Dalang	Rajoo	1	gr
Rajoo	Tok Dalang	1	gr
Rajoo	Upin	5	gr
Upin	Sapy	1	gr
Ipin	Sapy	1	gr
Upin	Kak Ros	6	fam
Lim	Sapy	1	gr
Upin	Lim	2	gr
Upin	Rajoo	6	gr
Ipin	Rajoo	4	gr
Kak Ros	Badrol	2	gr
Ipin	Oopet	3	gr
Rajoo	Ipin	1	gr
Rajoo	Oopet	8	gr
Oopet	Rajoo	4	gr
Upin	Oopet	5	gr
Rajoo	Kak Ros	5	gr
Opah	Tok Dalang	1	gr
Muthu	Tok Dalang	4	gr
Tok Dalang	Opah	2	gr
Kak Ros	Rajoo	5	gr
Oopet	Upin	1	gr
Muthu	Opah	2	gr
Opah	Muthu	1	gr
Tok Dalang	Ah Tong	1	gr
Ah Tong	Tok Dalang	2	gr
Kak Ros	Upin	1	fam
Oopet	Kak Ros	1	gr
Kak Ros	Ipin	1	fam
Pak Mail	Tauke	1	gr
Tauke	Pak Mail	1	gr
Kak Ros	Lim	1	gr
Salleh	Upin	1	br
Salleh	Ipin	1	br
Kak Ros	Salleh	1	br
Salleh	Kak Ros	1	br
Ipin	Salleh	1	br
Pak Mail	Rajoo	1	br
Pak Mail	Oopet	1	br
Pak Mail	Mak Oopet	1	br
Badrol	Snake	1	br
Oopet	Mak Oopet	1	fam
Mak Oopet	Oopet	1	fam
Kak Ros	Opah	1	fam
Rajoo	Muthu	1	fam
Muthu	Rajoo	1	fam
Ah Tong	Lim	1	gr
Lim	Ah Tong	1	gr
Tok Dalang	Salleh	1	br
Ah Tong	Salleh	1	br

## Sheet: Details
Name	Gender	Race
Lim	M	Chinese
Badrol	M	Malay
Rokiah	F	Malay
Tok Dalang	M	Malay
Crew	U	Unknown
Pak Cik Bas	M	Malay
Mechanic	M	Unknown
Anak Pak Cik Bas	M	Malay
Pak Mail	M	Malay
Singh	M	Sikh
Upin	M	Malay
Ipin	M	Malay
Muthu	M	Indian
Salleh	M	Malay
Opah	F	Malay
Ah Tong	M	Chinese
Kak Ros	F	Malay
Driving Instructor	M	Malay
Driving Student	F	Malay
Rajoo	M	Indian
Sapy	F	Animal
Oopet	M	Animal
Tauke	M	Chinese
Mak Oopet	F	Animal
Snake	U	Animal
